# Supplementary material
Source: Springer Nature journal article supplement (https://www.springermedizin.de/resource/supplementary/12887_2014_1047_MOESM2_ESM.pdf/9476382)

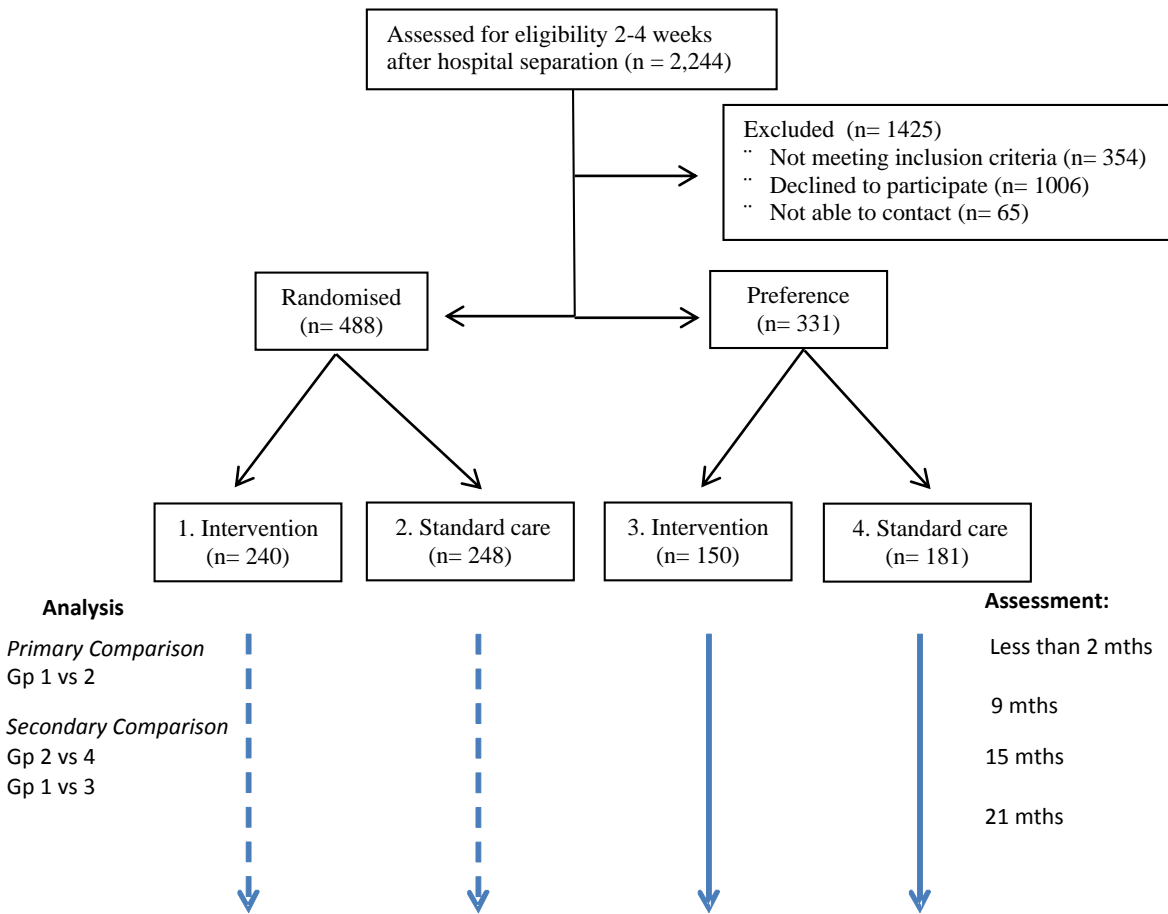

Supplement: MOESM2 [file 9476382]
